# Supplementary material for: 3D-cultivation of NSCLC cell lines induce gene expression alterations of key cancer-associated pathways and mimic in-vivo conditions
Source: PubMed Central journal article supplement (PMC5762538; doi:10.18632/oncotarget.22636), 2017-11-06
Supplement: oncotarget-08-112647-s001.pdf [file oncotarget-08-112647-s001.pdf]

### 3D-cultivation of NSCLC cell lines induce gene expression alterations of key cancer-associated pathways and mimic in-vivo conditions

#### SUPPLEMENTARY MATERIALS

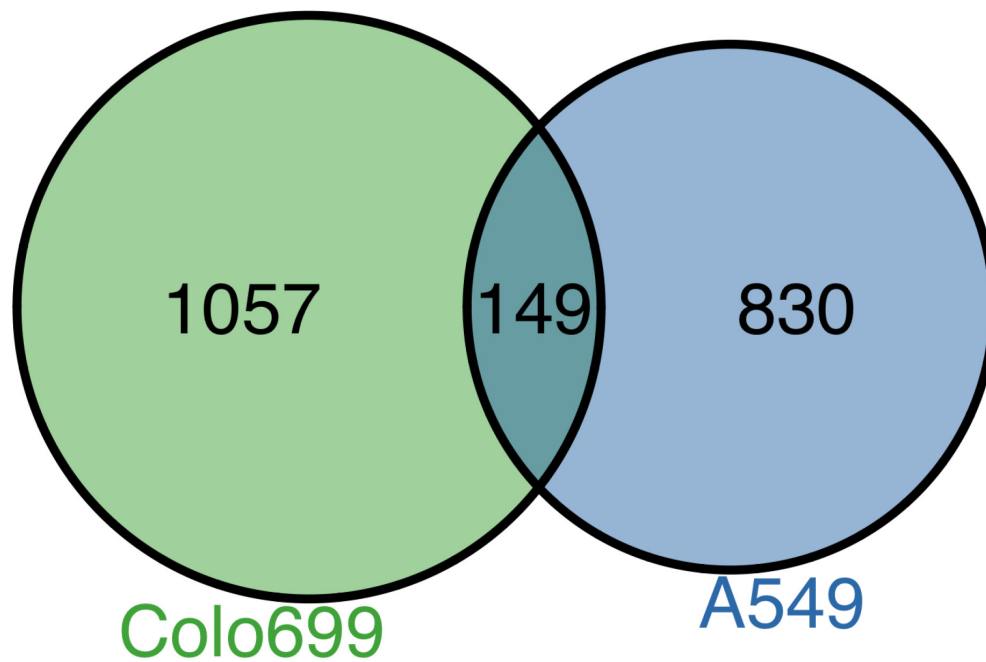

Supplementary Figure 1: Venn diagram comparing the numbers of significantly differentially expressed genes between 3D and 2D cell culture condition in A549 and Colo699 cells.

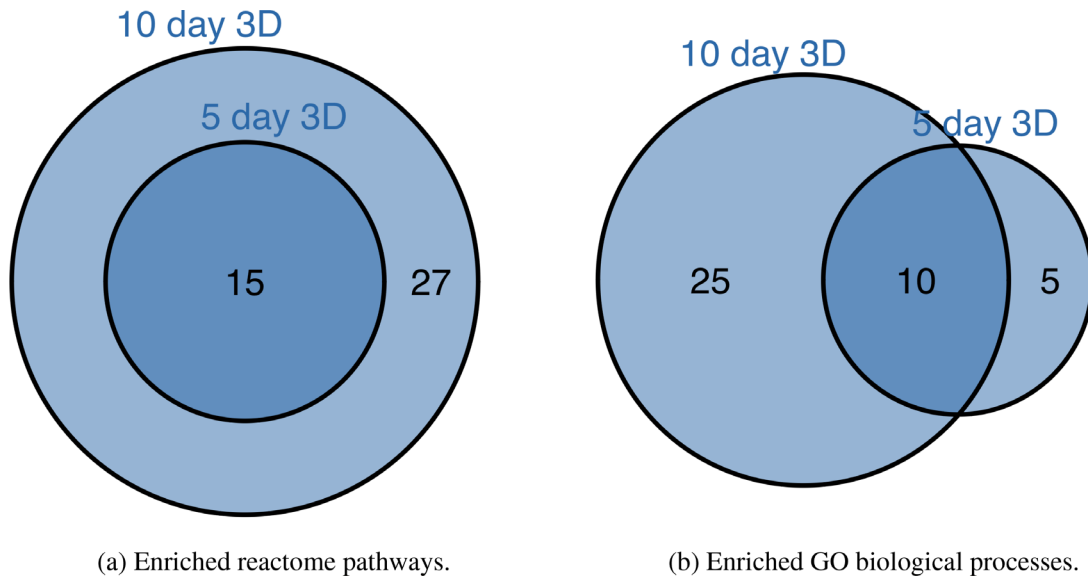

**Supplementary Figure 2: Venn diagram comparing the numbers enriched pathways or GO terms for the comparison of 10 day 3D vs 5 day 2D (10 day 3D) cultures or 5 day 3D vs 5 day 2D (5 day 3D) cultures of A549 cells.**

**Supplementary Table 1: STR Profiles of the two cell lines A549 and Colo-699**

| Marker<br>Cell line        | D5S818 | D13S317 | D7S820 | D16S539 | VWA    | TH01   | AM   | TPOX  | CSF1PO |
|----------------------------|--------|---------|--------|---------|--------|--------|------|-------|--------|
| Used cell line<br>A549     | 11, 11 | 11, 11  | 8, 11  | 11, 12  | 13, 14 | 8, 9.3 | ×, × | 8, 11 | 10, 12 |
| Used cell line<br>COLO-699 | 11, 12 | 11, 11  | 11, 13 | 12, 12  | 17, 17 | 9, 9.3 | ×, × | 8, 8  | 8, 8   |

**Supplementary Table 2: Pathways with significant overrepresentation of genes differentially expressed between 3D and 2D cultures of A549 cells**

| Pathway name                                                                                    | padj  | Count | Size |
|-------------------------------------------------------------------------------------------------|-------|-------|------|
| DNA methylation                                                                                 | 0.000 | 24    | 30   |
| Activated PKN1 stimulates transcription of AR (androgen receptor) regulated genes KLK2 and KLK3 | 0.000 | 24    | 33   |
| SIRT1 negatively regulates rRNA Expression                                                      | 0.000 | 24    | 34   |
| Meiotic recombination                                                                           | 0.000 | 28    | 50   |
| Amyloids                                                                                        | 0.000 | 28    | 50   |
| PRC2 methylates histones and DNA                                                                | 0.000 | 24    | 39   |
| RHO GTPases activate PKNs                                                                       | 0.000 | 26    | 56   |
| Meiosis                                                                                         | 0.000 | 30    | 80   |
| Senescence-Associated Secretory Phenotype (SASP)                                                | 0.000 | 27    | 68   |
| Condensation of Prophase Chromosomes                                                            | 0.000 | 17    | 26   |
| RHO GTPase Effectors                                                                            | 0.000 | 46    | 227  |
| Packaging Of Telomere Ends                                                                      | 0.000 | 14    | 20   |
| NoRC negatively regulates rRNA expression                                                       | 0.000 | 24    | 69   |
| Transcriptional regulation by small RNAs                                                        | 0.000 | 24    | 69   |
| Negative epigenetic regulation of rRNA expression                                               | 0.000 | 24    | 72   |
| Signaling by Rho GTPases                                                                        | 0.000 | 55    | 340  |
| Oxidative Stress Induced Senescence                                                             | 0.000 | 25    | 84   |
| Regulatory RNA pathways                                                                         | 0.000 | 26    | 96   |
| DNA Damage/Telomere Stress Induced Senescence                                                   | 0.000 | 16    | 36   |
| RMTs methylate histone arginines                                                                | 0.000 | 15    | 32   |
| Deposition of new CENPA-containing nucleosomes at the centromere                                | 0.000 | 17    | 43   |
| Nucleosome assembly                                                                             | 0.000 | 17    | 43   |
| Epigenetic regulation of gene expression                                                        | 0.000 | 24    | 88   |
| HDMS demethylate histones                                                                       | 0.000 | 15    | 34   |
| Meiotic synapsis                                                                                | 0.000 | 17    | 47   |
| HATs acetylate histones                                                                         | 0.000 | 27    | 118  |
| Cellular Senescence                                                                             | 0.000 | 29    | 137  |
| formation of the beta-catenin:TCF transactivating complex                                       | 0.000 | 16    | 44   |
| Cell Cycle                                                                                      | 0.000 | 60    | 482  |
| PKMTs methylate histone lysines                                                                 | 0.000 | 15    | 49   |
| HDACs deacetylate histones                                                                      | 0.000 | 14    | 44   |
| Telomere Maintenance                                                                            | 0.000 | 14    | 45   |
| Mitotic Prophase                                                                                | 0.000 | 18    | 75   |
| Chromosome Maintenance                                                                          | 0.001 | 17    | 74   |
| Hemostasis                                                                                      | 0.002 | 51    | 436  |
| Response to elevated platelet cytosolic Ca <sup>2+</sup>                                        | 0.004 | 17    | 84   |
| Chromatin modifying enzymes                                                                     | 0.006 | 30    | 214  |
| Chromatin organization                                                                          | 0.006 | 30    | 214  |
| Platelet degranulation                                                                          | 0.007 | 16    | 79   |
| TCF dependent signaling in response to WNT                                                      | 0.011 | 25    | 168  |
| Cell Cycle, Mitotic                                                                             | 0.013 | 45    | 398  |
| M Phase                                                                                         | 0.046 | 29    | 228  |

Columns p adj, Count and Size contain the Bonferroni adjusted *p*-values, the number of differentially expressed genes in the pathway and the total number of genes in the pathway, respectively.

### Supplementary Table 3: Pathways with significant overrepresentation of genes differentially expressed between 3D and 2D cultures of Colo699 cells

| Pathway name                                                                                    | padj  | Count | Size |
|-------------------------------------------------------------------------------------------------|-------|-------|------|
| Cell Cycle                                                                                      | 0.000 | 111   | 482  |
| Cell Cycle, Mitotic                                                                             | 0.000 | 90    | 398  |
| SIRT1 negatively regulates rRNA Expression                                                      | 0.000 | 26    | 34   |
| Meiotic recombination                                                                           | 0.000 | 31    | 50   |
| DNA methylation                                                                                 | 0.000 | 24    | 30   |
| Activated PKN1 stimulates transcription of AR (androgen receptor) regulated genes KLK2 and KLK3 | 0.000 | 24    | 33   |
| PRC2 methylates histones and DNA                                                                | 0.000 | 25    | 39   |
| Condensation of Prophase Chromosomes                                                            | 0.000 | 20    | 26   |
| Deposition of new CENPA-containing nucleosomes at the centromere                                | 0.000 | 25    | 43   |
| Nucleosome assembly                                                                             | 0.000 | 25    | 43   |
| Meiosis                                                                                         | 0.000 | 33    | 80   |
| RHO GTPase Effectors                                                                            | 0.000 | 57    | 227  |
| Signaling by Rho GTPases                                                                        | 0.000 | 72    | 340  |
| Amyloids                                                                                        | 0.000 | 26    | 50   |
| Chromosome Maintenance                                                                          | 0.000 | 31    | 74   |
| Senescence-Associated Secretory Phenotype (SASP)                                                | 0.000 | 29    | 68   |
| RHO GTPases activate PKNs                                                                       | 0.000 | 26    | 56   |
| M Phase                                                                                         | 0.000 | 52    | 228  |
| HATs acetylate histones                                                                         | 0.000 | 35    | 118  |
| Negative epigenetic regulation of rRNA expression                                               | 0.000 | 27    | 72   |
| NoRC negatively regulates rRNA expression                                                       | 0.000 | 26    | 69   |
| Oxidative Stress Induced Senescence                                                             | 0.000 | 28    | 84   |
| Packaging Of Telomere Ends                                                                      | 0.000 | 14    | 20   |
| Mitotic Prometaphase                                                                            | 0.000 | 30    | 99   |
| Telomere Maintenance                                                                            | 0.000 | 20    | 45   |
| Epigenetic regulation of gene expression                                                        | 0.000 | 28    | 88   |
| Resolution of Sister Chromatid Cohesion                                                         | 0.000 | 28    | 91   |
| Transcriptional regulation by small RNAs                                                        | 0.000 | 24    | 69   |
| DNA Damage/Telomere Stress Induced Senescence                                                   | 0.000 | 16    | 36   |
| RMTs methylate histone arginines                                                                | 0.000 | 15    | 32   |
| RHO GTPases Activate Formins                                                                    | 0.000 | 27    | 101  |
| HDMs demethylate histones                                                                       | 0.000 | 15    | 34   |
| Mitotic Prophase                                                                                | 0.000 | 22    | 75   |
| Cellular Senescence                                                                             | 0.000 | 31    | 137  |
| Regulatory RNA pathways                                                                         | 0.000 | 25    | 96   |
| Meiotic synapsis                                                                                | 0.000 | 17    | 47   |
| Chromatin modifying enzymes                                                                     | 0.000 | 40    | 214  |
| Chromatin organization                                                                          | 0.000 | 40    | 214  |
| PKMTs methylate histone lysines                                                                 | 0.000 | 17    | 49   |
| Polo-like kinase mediated events                                                                | 0.000 | 9     | 16   |
| Cholesterol biosynthesis                                                                        | 0.000 | 10    | 21   |
| G2/M Checkpoints                                                                                | 0.001 | 15    | 50   |
| formation of the beta-catenin/TCF transactivating complex                                       | 0.001 | 14    | 44   |
| HDACs deacetylate histones                                                                      | 0.001 | 14    | 44   |
| Separation of Sister Chromatids                                                                 | 0.001 | 28    | 148  |
| Factors involved in megakaryocyte development and platelet production                           | 0.002 | 23    | 112  |
| Cyclin A/B1 associated events during G2/M transition                                            | 0.002 | 8     | 16   |
| Mitotic Anaphase                                                                                | 0.002 | 28    | 156  |
| Activation of ATR in response to replication stress                                             | 0.002 | 12    | 37   |
| Mitotic Metaphase and Anaphase                                                                  | 0.003 | 28    | 157  |
| E2F mediated regulation of DNA replication                                                      | 0.004 | 10    | 27   |
| Phosphorylation of proteins involved in G1/S transition by active Cyclin E:Cdk2 complexes       | 0.009 | 4     | 4    |
| Activation of the pre-replicative complex                                                       | 0.010 | 10    | 30   |
| Mitotic G1-G1/S phases                                                                          | 0.015 | 22    | 120  |
| Cellular responses to stress                                                                    | 0.015 | 36    | 248  |
| G2/M Transition                                                                                 | 0.028 | 20    | 108  |
| G1/S-Specific Transcription                                                                     | 0.028 | 6     | 12   |
| Kinesins                                                                                        | 0.029 | 8     | 22   |
| Mitotic G2-G2/M phases                                                                          | 0.034 | 20    | 110  |

Columns padj, Count and Size contain the Bonferroni adjusted p-values, the number of differentially expressed genes in the pathway and the total number of genes in the pathway, respectively.

**Supplementary Table 4: Gene Ontology biological processes with significant overrepresentation of genes differentially expressed between 3D and 2D cultures of A549 cells**

|            | <b>Term</b>                                                 | <b>padj</b> | <b>Count</b> | <b>Size</b> |
|------------|-------------------------------------------------------------|-------------|--------------|-------------|
| GO:0032776 | DNA methylation on cytosine                                 | 0.000       | 24           | 31          |
| GO:0006335 | DNA replication-dependent nucleosome assembly               | 0.000       | 24           | 32          |
| GO:0051290 | protein heterotetramerization                               | 0.000       | 24           | 35          |
| GO:0000183 | chromatin silencing at rDNA                                 | 0.000       | 24           | 41          |
| GO:0035574 | histone H4-K20 demethylation                                | 0.000       | 14           | 16          |
| GO:0045653 | negative regulation of megakaryocyte differentiation        | 0.000       | 14           | 18          |
| GO:0006305 | DNA alkylation                                              | 0.000       | 26           | 82          |
| GO:0044728 | DNA methylation or demethylation                            | 0.000       | 26           | 95          |
| GO:0031497 | chromatin assembly                                          | 0.000       | 31           | 141         |
| GO:0034080 | CENP-A containing nucleosome assembly                       | 0.000       | 17           | 42          |
| GO:1901532 | regulation of hematopoietic progenitor cell differentiation | 0.000       | 17           | 42          |
| GO:0071103 | DNA conformation change                                     | 0.000       | 40           | 235         |
| GO:0001568 | blood vessel development                                    | 0.000       | 66           | 533         |
| GO:0072358 | cardiovascular system development                           | 0.000       | 93           | 884         |
| GO:0050878 | regulation of body fluid levels                             | 0.000       | 73           | 634         |
| GO:0065004 | protein-DNA complex assembly                                | 0.000       | 32           | 174         |
| GO:0034724 | DNA replication-independent nucleosome organization         | 0.000       | 17           | 53          |
| GO:0016577 | histone demethylation                                       | 0.000       | 14           | 35          |
| GO:0008214 | protein dealkylation                                        | 0.000       | 14           | 37          |
| GO:0051674 | localization of cell                                        | 0.000       | 112          | 1229        |
| GO:0045814 | negative regulation of gene expression, epigenetic          | 0.000       | 27           | 148         |
| GO:0070988 | demethylation                                               | 0.000       | 17           | 63          |
| GO:0000278 | mitotic cell cycle                                          | 0.000       | 19           | 81          |
| GO:0007264 | small GTPase mediated signal transduction                   | 0.000       | 85           | 893         |
| GO:0060968 | regulation of gene silencing                                | 0.000       | 13           | 40          |
| GO:0043044 | ATP-dependent chromatin remodeling                          | 0.001       | 17           | 73          |
| GO:0051716 | cellular response to stimulus                               | 0.002       | 417          | 6663        |
| GO:0051271 | negative regulation of cellular component movement          | 0.009       | 29           | 209         |
| GO:0051259 | protein oligomerization                                     | 0.015       | 47           | 440         |
| GO:0048864 | stem cell development                                       | 0.022       | 23           | 151         |
| GO:0051783 | regulation of nuclear division                              | 0.023       | 24           | 162         |
| GO:0044700 | single organism signaling                                   | 0.033       | 365          | 5855        |
| GO:0045861 | negative regulation of proteolysis                          | 0.034       | 32           | 261         |
| GO:0031100 | organ regeneration                                          | 0.039       | 15           | 75          |
| GO:0010951 | negative regulation of endopeptidase activity               | 0.044       | 29           | 226         |

Columns padj, Count and Size contain the Bonferroni adjusted *p*-values, the number of differentially expressed genes in the term and the total number of genes in the term, respectively.

**Supplementary Table 5: Gene Ontology biological processes with significant overrepresentation of genes differentially expressed between 3D and 2D cultures of Colo699 cells**

|            | <b>Term</b>                                                 | <b>padj</b> | <b>Count</b> | <b>Size</b> |
|------------|-------------------------------------------------------------|-------------|--------------|-------------|
| GO:0006323 | DNA packaging                                               | 0.000       | 58           | 176         |
| GO:0006335 | DNA replication-dependent nucleosome assembly               | 0.000       | 26           | 32          |
| GO:0071824 | protein-DNA complex subunit organization                    | 0.000       | 60           | 201         |
| GO:0051290 | protein heterotetramerization                               | 0.000       | 26           | 35          |
| GO:0032776 | DNA methylation on cytosine                                 | 0.000       | 24           | 31          |
| GO:0000183 | chromatin silencing at rDNA                                 | 0.000       | 27           | 41          |
| GO:0034080 | CENP-A containing nucleosome assembly                       | 0.000       | 25           | 42          |
| GO:0034724 | DNA replication-independent nucleosome organization         | 0.000       | 26           | 53          |
| GO:0035574 | histone H4-K20 demethylation                                | 0.000       | 15           | 16          |
| GO:0051276 | chromosome organization                                     | 0.000       | 126          | 988         |
| GO:0048285 | organelle fission                                           | 0.000       | 83           | 549         |
| GO:0045653 | negative regulation of megakaryocyte differentiation        | 0.000       | 14           | 18          |
| GO:0043044 | ATP-dependent chromatin remodeling                          | 0.000       | 26           | 73          |
| GO:0071822 | protein complex subunit organization                        | 0.000       | 171          | 1629        |
| GO:0044728 | DNA methylation or demethylation                            | 0.000       | 27           | 95          |
| GO:0006305 | DNA alkylation                                              | 0.000       | 25           | 82          |
| GO:0045814 | negative regulation of gene expression, epigenetic          | 0.000       | 34           | 148         |
| GO:0006334 | nucleosome assembly                                         | 0.000       | 26           | 93          |
| GO:0016577 | histone demethylation                                       | 0.000       | 16           | 35          |
| GO:0051301 | cell division                                               | 0.000       | 44           | 255         |
| GO:0008214 | protein dealkylation                                        | 0.000       | 16           | 37          |
| GO:0000278 | mitotic cell cycle                                          | 0.000       | 33           | 165         |
| GO:0044770 | cell cycle phase transition                                 | 0.000       | 50           | 312         |
| GO:0070271 | protein complex biogenesis                                  | 0.000       | 127          | 1201        |
| GO:0007264 | small GTPase mediated signal transduction                   | 0.000       | 77           | 618         |
| GO:1901532 | regulation of hematopoietic progenitor cell differentiation | 0.000       | 16           | 42          |
| GO:0006333 | chromatin assembly or disassembly                           | 0.000       | 26           | 113         |
| GO:0034622 | cellular macromolecular complex assembly                    | 0.000       | 91           | 790         |
| GO:0070988 | demethylation                                               | 0.000       | 18           | 63          |
| GO:0022607 | cellular component assembly                                 | 0.000       | 184          | 2082        |
| GO:0098813 | nuclear chromosome segregation                              | 0.001       | 27           | 144         |
| GO:0060968 | regulation of gene silencing                                | 0.003       | 13           | 40          |
| GO:1903707 | negative regulation of hemopoiesis                          | 0.005       | 24           | 128         |
| GO:0000086 | G2/M transition of mitotic cell cycle                       | 0.011       | 27           | 163         |
| GO:0000723 | telomere maintenance                                        | 0.013       | 15           | 60          |
| GO:0051259 | protein oligomerization                                     | 0.022       | 52           | 440         |

Columns padj, Count and Size contain the Bonferroni adjusted  $p$ -values, the number of differentially expressed genes in the term and the total number of genes in the term, respectively.

**Supplementary Table 6: Reactome pathways with significant overrepresentation of genes differentially expressed between 5 day 3D and 5 day 2D cultures of A549 cells**

| Pathway name                                                                                    | padj  | Count | Size |
|-------------------------------------------------------------------------------------------------|-------|-------|------|
| Packaging Of Telomere Ends                                                                      | 0.000 | 14    | 20   |
| formation of the beta-catenin:TCF transactivating complex                                       | 0.000 | 19    | 44   |
| HDMs demethylate histones                                                                       | 0.000 | 16    | 34   |
| Condensation of Prophase Chromosomes                                                            | 0.000 | 14    | 26   |
| Amyloids                                                                                        | 0.000 | 19    | 50   |
| DNA Damage/Telomere Stress Induced Senescence                                                   | 0.000 | 16    | 36   |
| RMTs methylate histone arginines                                                                | 0.000 | 15    | 32   |
| Activated PKN1 stimulates transcription of AR (androgen receptor) regulated genes KLK2 and KLK3 | 0.000 | 15    | 33   |
| DNA methylation                                                                                 | 0.000 | 14    | 30   |
| SIRT1 negatively regulates rRNA Expression                                                      | 0.000 | 14    | 34   |
| Meiotic synapsis                                                                                | 0.000 | 16    | 47   |
| PRC2 methylates histones and DNA                                                                | 0.000 | 14    | 39   |
| TCF dependent signaling in response to WNT                                                      | 0.001 | 31    | 168  |
| Deposition of new CENPA-containing nucleosomes at the centromere                                | 0.001 | 14    | 43   |
| Nucleosome assembly                                                                             | 0.001 | 14    | 43   |

Columns padj, Count and Size contain the Bonferroni adjusted  $p$ -values, the number of differentially expressed genes in the pathway and the total number of genes in the pathway, respectively.

**Supplementary Table 7: Gene Ontology biological processes with significant overrepresentation of genes differentially expressed between 5 day 3D and 5 day 2D cultures of A549 cells**

| Term                                                            | padj  | Count | Size |
|-----------------------------------------------------------------|-------|-------|------|
| GO:0035574 histone H4-K20 demethylation                         | 0.000 | 14    | 16   |
| GO:0045653 negative regulation of megakaryocyte differentiation | 0.000 | 14    | 18   |
| GO:0016577 histone demethylation                                | 0.000 | 16    | 35   |
| GO:0006335 DNA replication-dependent nucleosome assembly        | 0.000 | 15    | 32   |
| GO:0008214 protein dealkylation                                 | 0.000 | 16    | 37   |
| GO:0032776 DNA methylation on cytosine                          | 0.000 | 14    | 31   |
| GO:2000145 regulation of cell motility                          | 0.000 | 81    | 625  |
| GO:0032502 developmental process                                | 0.000 | 455   | 5551 |
| GO:0070988 demethylation                                        | 0.000 | 19    | 63   |
| GO:0051674 localization of cell                                 | 0.000 | 132   | 1229 |
| GO:0051290 protein heterotetramerization                        | 0.000 | 14    | 35   |
| GO:0048869 cellular developmental process                       | 0.000 | 331   | 3849 |
| GO:0016265 death                                                | 0.000 | 182   | 1872 |
| GO:0009888 tissue development                                   | 0.000 | 165   | 1680 |
| GO:0001568 blood vessel development                             | 0.000 | 71    | 553  |

Columns padj, Count and Size contain the Bonferroni adjusted  $p$ -values, the number of differentially expressed genes in the term and the total number of genes in the term, respectively.
